# Supplementary material for: Field Evaluation and Calibration of Low-Cost Air Pollution Sensors for Environmental Exposure Research
Source: MDPI journal article supplement (doi:10.3390/s22062381), 2022-03-19
Supplement: s1 [file s1]

## Supporting Information

### Field Evaluation and Calibration of Low-Cost Air Pollution Sensors for Environmental Exposure Research

Jianwei Huang<sup>1</sup>, Mei-Po Kwan<sup>1,2,\*</sup>, Jiannan Cai<sup>1</sup>, Wanying Song<sup>1</sup>, Changda Yu<sup>1</sup>, Zihan Kan<sup>1</sup>,  
Steve Hung-Lam Yim<sup>3,4,5</sup>

<sup>1</sup> Institute of Space and Earth Information Science, The Chinese University of Hong Kong, Hong Kong, China.

<sup>2</sup> Department of Geography and Resource Management, The Chinese University of Hong Kong, Hong Kong, China.

<sup>3</sup> Asian School of the Environment, Nanyang Technological University, Singapore.

<sup>4</sup> Lee Kong Chian School of Medicine, Nanyang Technological University, Singapore.

<sup>5</sup> Earth Observatory of Singapore, Nanyang Technological University, Singapore.

\* Corresponding author

Email: [mpkwan@cuhk.edu.hk](mailto:mpkwan@cuhk.edu.hk)

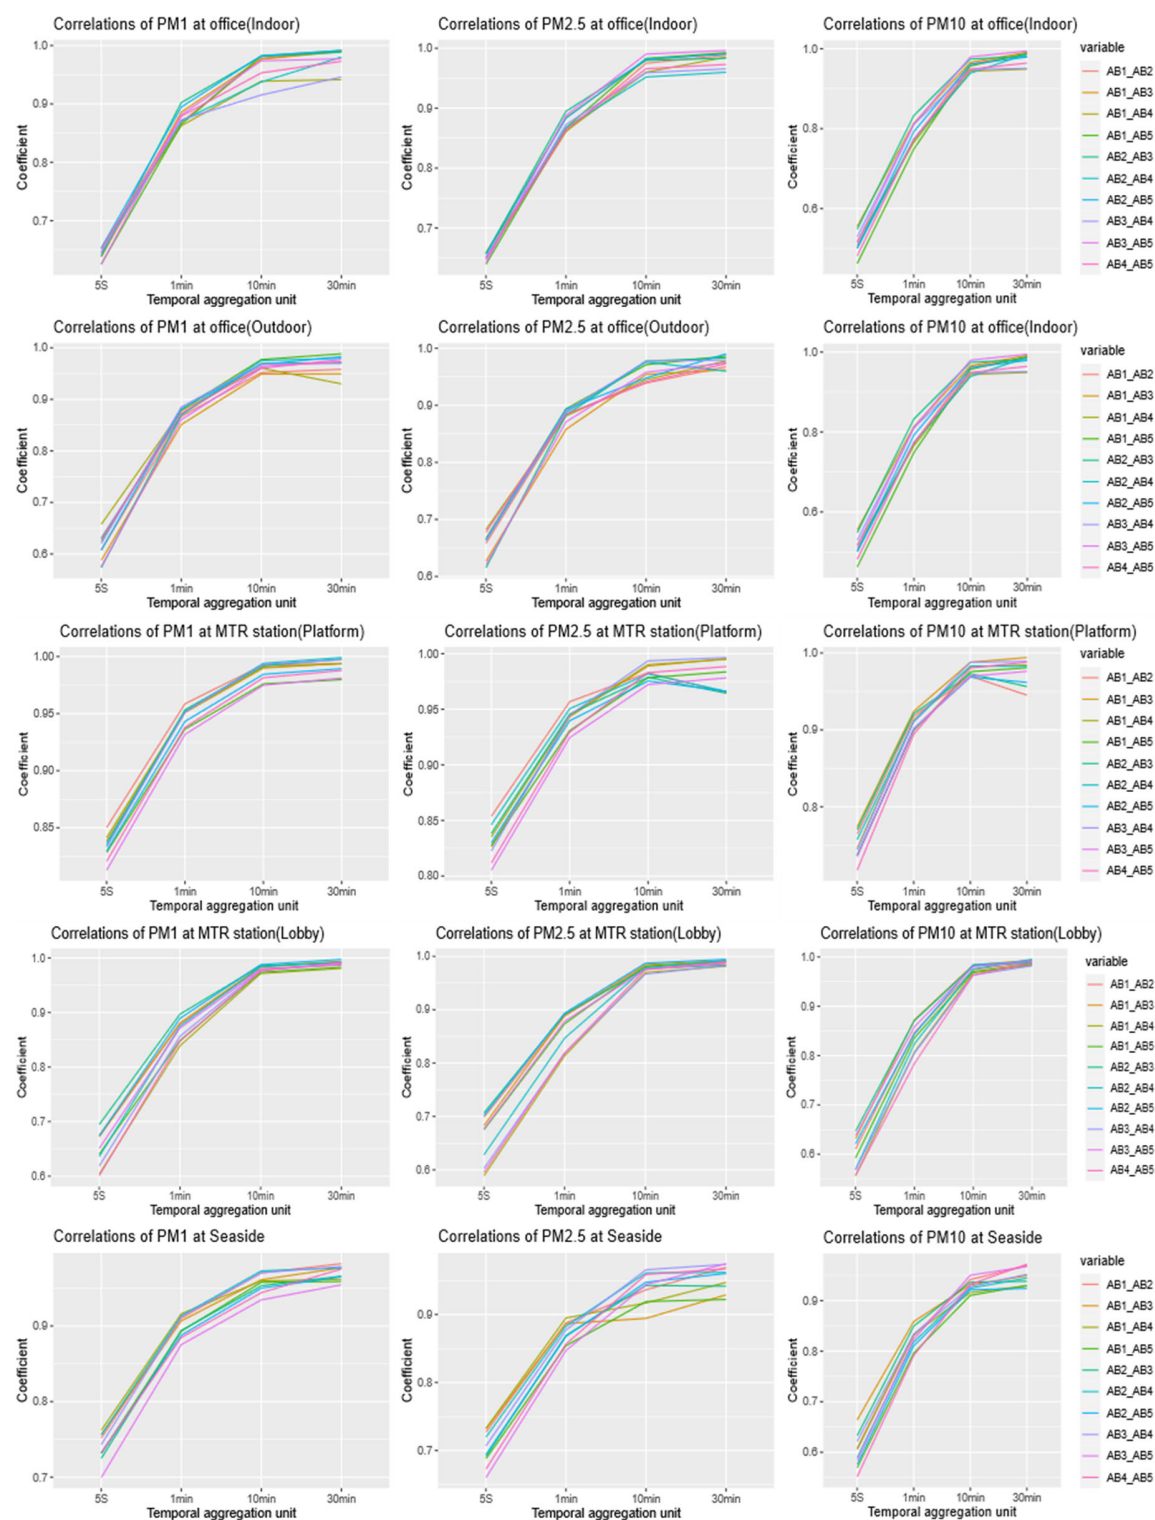

**Figure S1.** Correlations for the PM<sub>1</sub>, PM<sub>2.5</sub>, and PM<sub>10</sub> concentrations ( $\mu\text{g}/\text{m}^3$ ) reported by the AirBeam2 sensors in different environments and aggregated in different temporal units (i.e., 5-sec, 1-min, 10-min and 30-min).

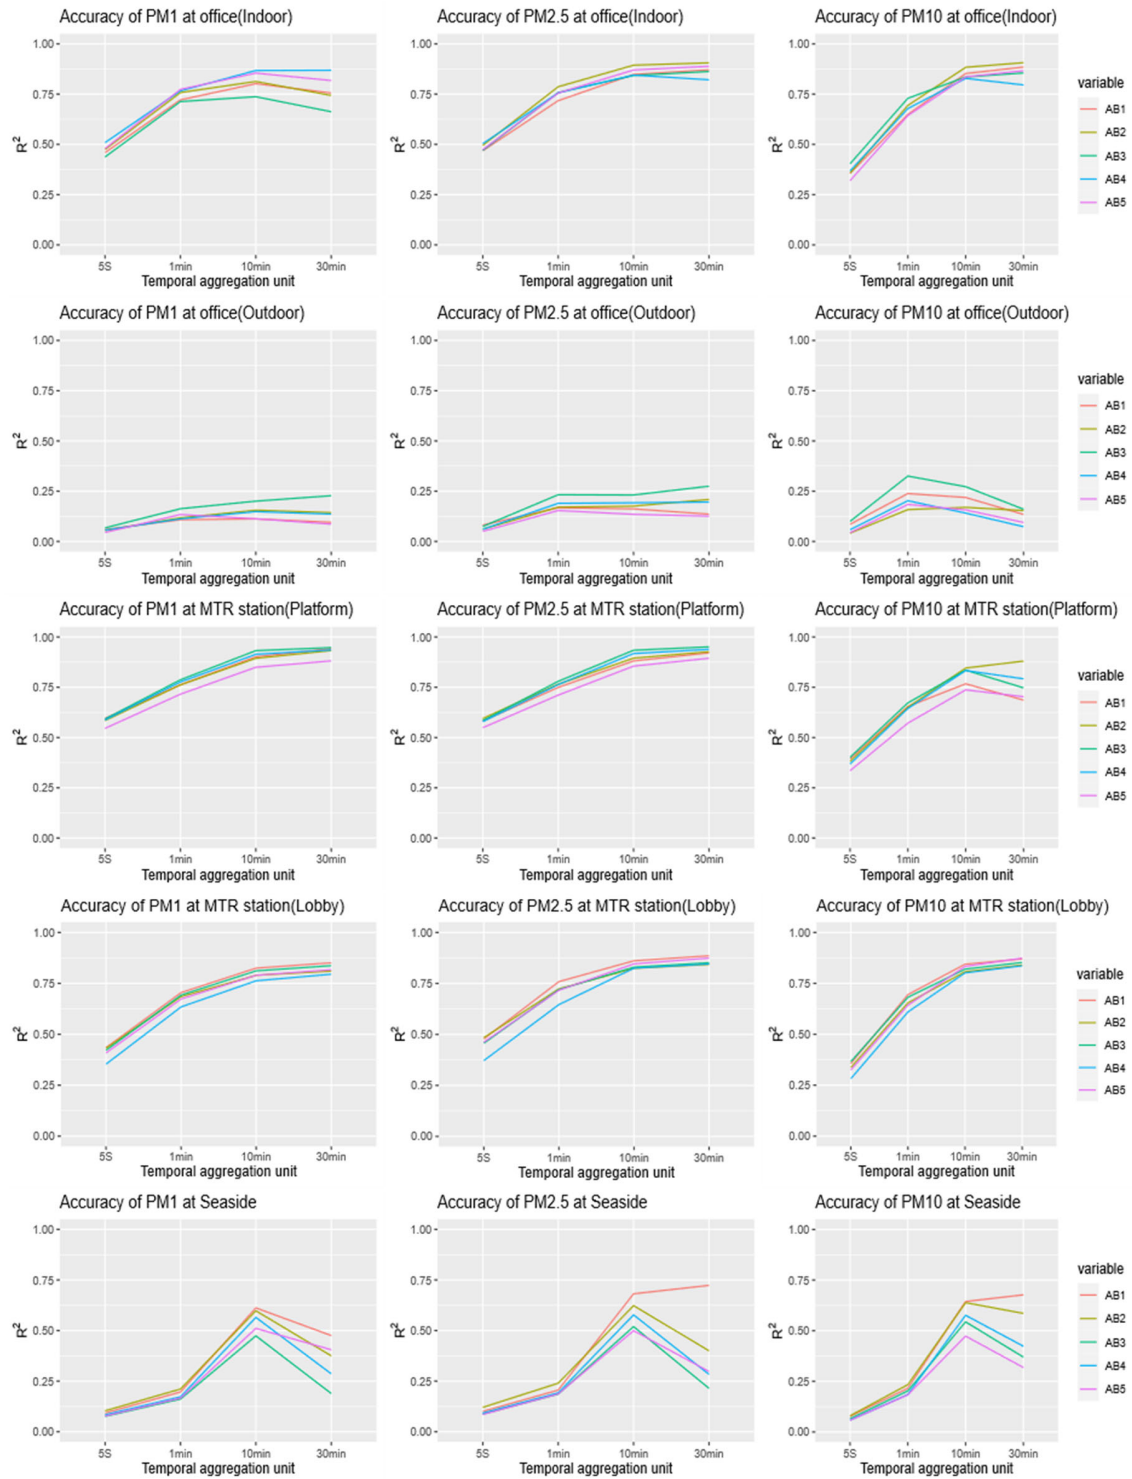

**Figure S2.**  $R^2$  of Linear regression models for the PM<sub>1</sub>, PM<sub>2.5</sub>, and PM<sub>10</sub> concentrations ( $\mu\text{g}/\text{m}^3$ ) reported by AirBeam2 and DustTrak sensors, and aggregated in different temporal units (i.e., 5-sec, 1-min, 10-min and 30-min).

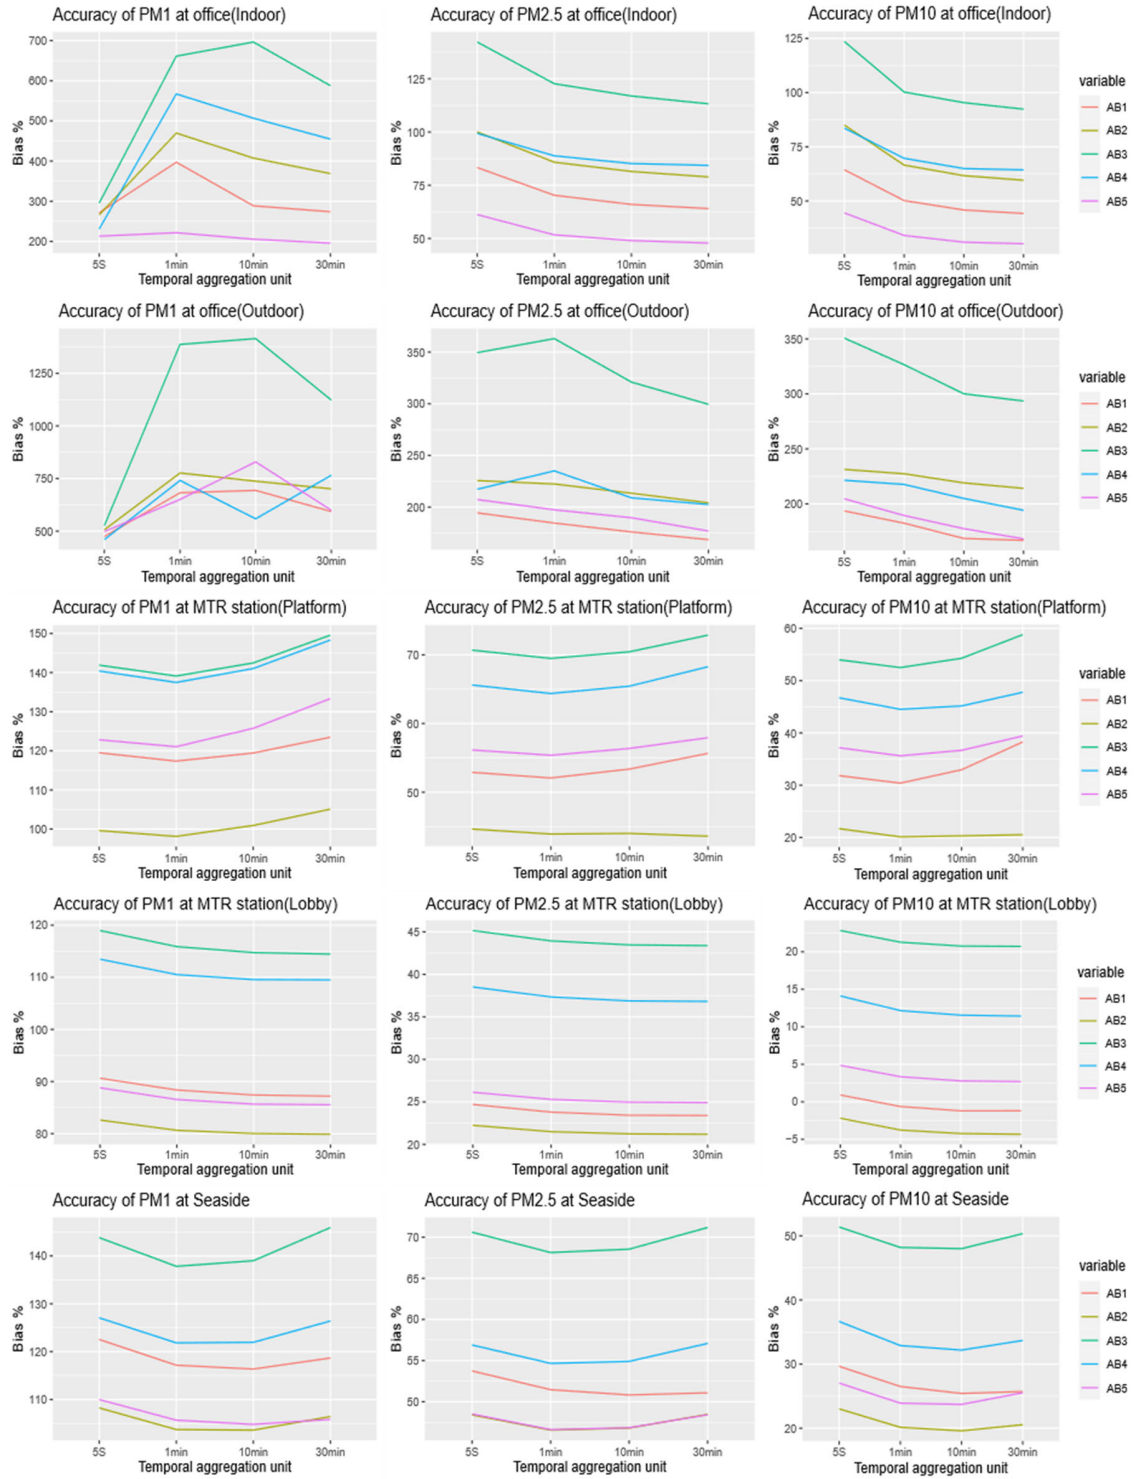

**Figure S3.** Bias percentage for the PM<sub>1</sub>, PM<sub>2.5</sub>, and PM<sub>10</sub> concentrations ( $\mu\text{g}/\text{m}^3$ ) reported by AirBeam2 and DustTrak sensors and aggregated in different temporal units (i.e., 5-sec, 1-min, 10-min and 30-min).
